# Supplementary material for: Transcriptome of pancreas-specific Bmpr1a-deleted islets links to TPH1–5-HT axis
Source: PubMed Central journal article supplement (PMC4542282; doi:10.1242/bio.011858), 2015-07-17
Supplement: supp_bio.011858_BIO011858supp.pdf [file supp_bio.011858_BIO011858supp.pdf]

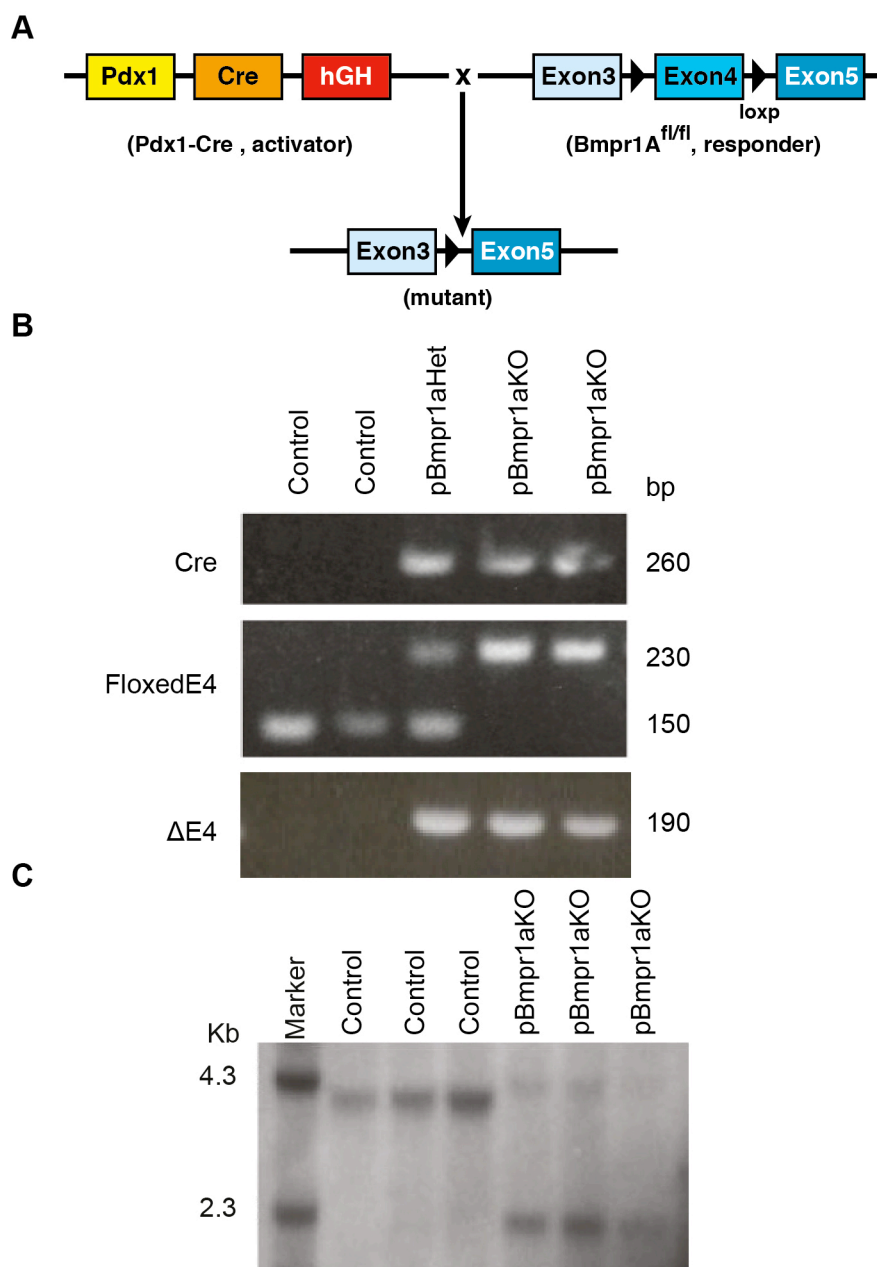

**Fig. S1. Strategies for generating pancreas-specific deletion of *Bmpr1a* and for genotyping.** (A) Schema of *Bmpr1a* exon-4 deletion. (B) PCR-based strategy for genotyping mutant mice. The 5' gcagctgctgctgcagcctcc 3'; 5' tggctacaattgtctcatgc 3' primers were used to detect either a 150 Wildtype sequence or a 230 floxed sequence. The 5' ggtttggatcttaaccttagg 3'; 5' tggctacaattgtctcatgc 3' primers were used to detect a product after the deletion of the floxed sequence, as described (Mishina et al., 1995). (C) Southern analysis of Cre-mediated deletion of *Bmpr1a*. Genomic DNA was purified from E19.5 pancreas and probed with H23 as described previously (Ahn et al., 2001).

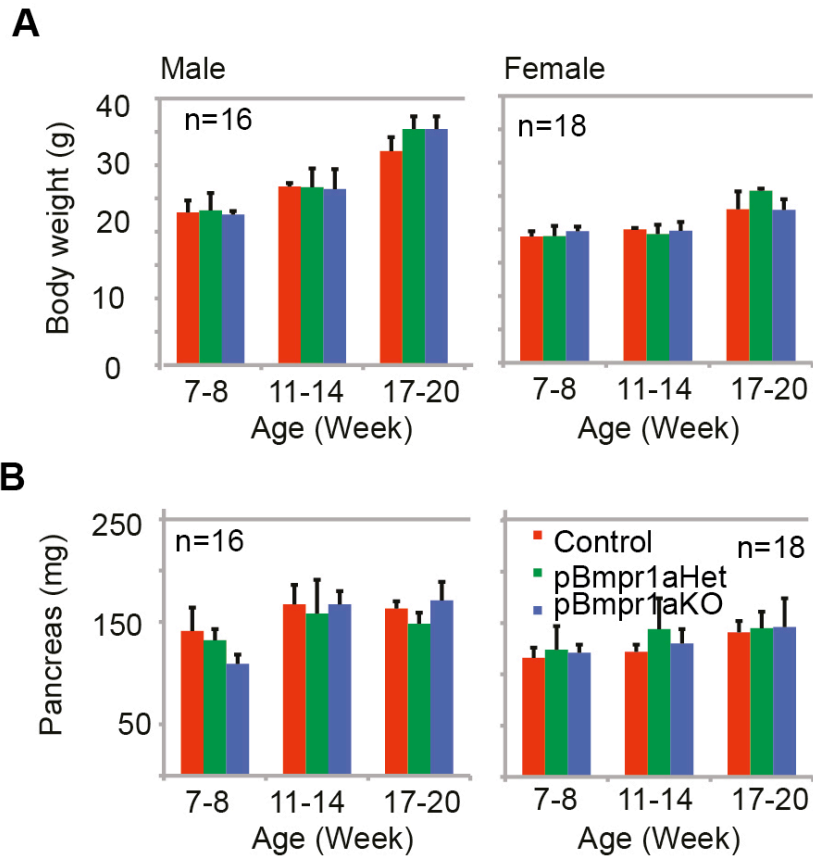

**Fig. S2 Postnatal analyses of Control and pBmpr1aKO mice.** Body and pancreas masses in male and female mice in a dynamic age range from 7 to 20 weeks with indicated numbers of mice studied. (mean±s.d.).

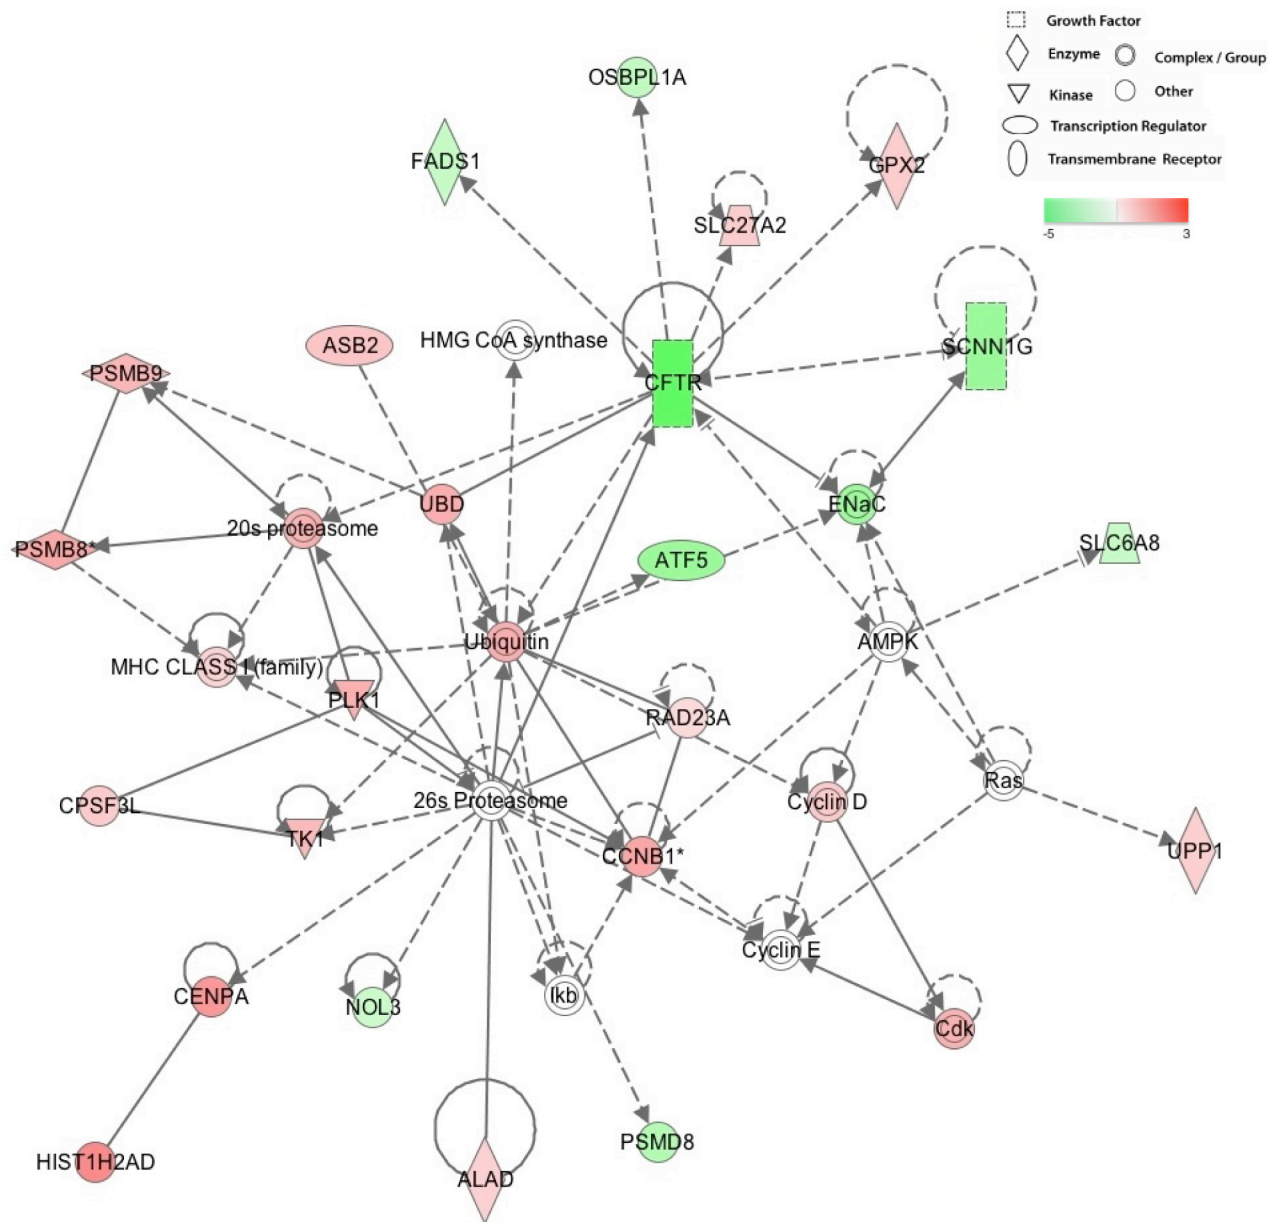

**Fig. S3 Stress, transporters and DNA replication regulatory map.** Generated by the Ingenuity pathway analysis of differentially expressed metabolic genes identified from the processed transcriptomic datasets between pBmpr1aKO and Control islets at 3 months.

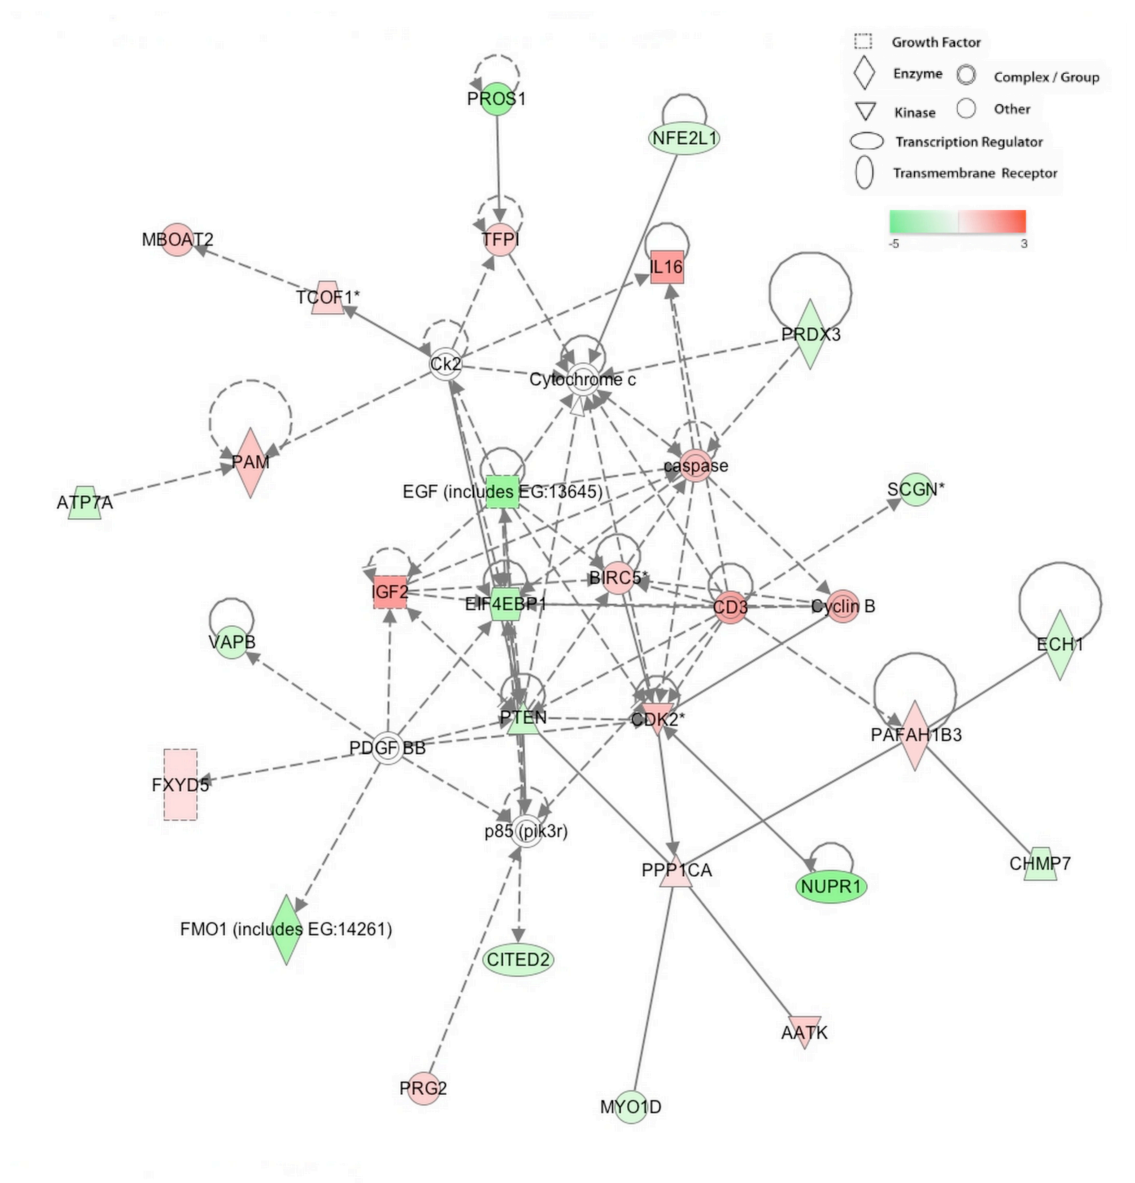

**Fig. S4 Cell cycle and apoptosis regulatory map.** Generated by the Ingenuity pathway analysis of differentially expressed metabolic genes identified from the processed genome-wide transcriptomic datasets between pBmpr1aKO and Control islets at 3 months.
